# Supplementary material
Source: Royal Society of Chemistry journal article supplement (doi:10.1039/d6ja00119j)
Supplement: d6ja00119j1.pdf [file d6ja00119j1.pdf]

## Supplementary Information (SI)

# Optimization of Internal Standard Selection for Precise Trace Impurity Quantification in Li<sub>2</sub>S via ICP-OES

Woomi Lee<sup>a</sup>, Kwang-Sun Ryu<sup>a\*</sup>

<sup>a</sup>Department of Chemistry, University of Ulsan, Doowang-dong, Nam-Gu, Ulsan, 44776, Republic of Korea

\*Corresponding author e-mail address: ryuks@ulsan.ac.kr

Table S1. Mean signal intensities and RSD (%) of each IS from eight replicate measurements (n = 8) in a 1% (w/v) Li<sub>2</sub>S matrix spiked with 1 mg/L IS stock solution.

| Internal Standard | Line (nm) | Mean Intensity | RSD (%) |
|-------------------|-----------|----------------|---------|
| <b>Y</b>          | 371.029   | 297754.8       | 1.9     |
|                   | 324.227   | 25245.8        | 2.7     |
| <b>Ru</b>         | 240.272   | 2448.2         | 2.0     |
|                   | 349.894   | 14246.5        | 1.6     |
| <b>Bi</b>         | 223.061   | 1466.5         | 2.3     |
|                   | 190.171   | 246.4          | 1.7     |
|                   | 306.766   | 52683.7        | 0.9     |
| <b>In</b>         | 230.606   | 799.2          | 4.0     |
|                   | 325.609   | 7632.9         | 2.0     |
| <b>Sc</b>         | 361.383   | 97883.9        | 2.4     |
|                   | 424.683   | 160718.5       | 2.5     |

IS stock solutions (1 mg/L) were spiked into 1% (w/v) Li<sub>2</sub>S matrix and analyzed in eight replicates (n = 8). All candidates exhibited RSD values below the 5.0% acceptance threshold, confirming reproducible analytical conditions.

Table S2. Mean signal intensities and RSD (%) of IS candidates measured in DW, 0.1% (w/v) Li<sub>2</sub>S, and 1% (w/v) Li<sub>2</sub>S matrices from eight replicate measurements (n = 8) at a spiked IS concentration of 1 mg/L.

| Interanal Standard | Line(nm) | Deionized |        | 0.1% Li <sub>2</sub> S |        | 1% Li <sub>2</sub> S |        |
|--------------------|----------|-----------|--------|------------------------|--------|----------------------|--------|
|                    |          | Ave       | RSD(%) | Ave                    | RSD(%) | Ave                  | RSD(%) |
| <b>Y</b>           | 371.029  | 423051.6  | 2.1    | 391675.2               | 2.8    | 334025.2             | 3.2    |
|                    | 324.227  | 26268.56  | 2.9    | 29786.5                | 4.9    | 27601.18             | 3.7    |
| <b>Ru</b>          | 240.272  | 3350.505  | 4.2    | 3586.9                 | 6.0    | 3089.211             | 3.2    |
|                    | 349.894  | 11658.73  | 0.8    | 16191.3                | 1.3    | 18209.45             | 3.2    |
| <b>Bi</b>          | 223.061  | 1649.693  | 2.9    | 1823.5                 | 3.0    | 1699.249             | 3.2    |
|                    | 190.171  | 344.9996  | 1.3    | 392.0                  | 2.3    | 315.3068             | 2.4    |
|                    | 306.766  | 58344.43  | 2.6    | 158073.7               | 6.3    | 149818               | 2.1    |
| <b>In</b>          | 230.606  | 2145.933  | 2.5    | 1519.3                 | 3.2    | 1195.567             | 2.7    |
|                    | 325.609  | 6754.189  | 1.6    | 9254.0                 | 1.1    | 10396.19             | 2.8    |
| <b>Sc</b>          | 361.383  | 122642.8  | 2.3    | 132545.8               | 3.4    | 118186.3             | 3.7    |
|                    | 424.683  | 215708.4  | 2.0    | 239203.7               | 2.0    | 208340.6             | 1.8    |

Table S3. Normalized relative intensities of IS candidates in 0.1% and 1% (w/v) Li<sub>2</sub>S matrices, expressed as the ratio of IS signal intensity in each Li<sub>2</sub>S matrix to that in DW. Values close to 1.0 indicate minimal matrix-induced signal perturbation.

| <b>Interanal Standard</b> | <b>Line(nm)</b> | <b>0.1% Li<sub>2</sub>S</b> | <b>1% Li<sub>2</sub>S</b> |
|---------------------------|-----------------|-----------------------------|---------------------------|
| <b>Y</b>                  | 371.029         | 0.93                        | 0.79                      |
|                           | 324.227         | 1.13                        | 1.05                      |
| <b>Ru</b>                 | 240.272         | 1.07                        | 0.92                      |
|                           | 349.894         | 1.39                        | 1.56                      |
| <b>Bi</b>                 | 223.061         | 1.11                        | 1.03                      |
|                           | 190.171         | 1.14                        | 0.91                      |
|                           | 306.766         | 2.71                        | 2.57                      |
| <b>In</b>                 | 230.606         | 0.71                        | 0.56                      |
|                           | 325.609         | 1.37                        | 1.54                      |
| <b>Sc</b>                 | 361.383         | 1.08                        | 0.96                      |
|                           | 424.683         | 1.11                        | 0.97                      |

Normalized intensities were calculated from mean emission signals of 11 IS candidates (n = 8). Values approaching unity (1.0) indicate minimal matrix-induced signal perturbation; deviations reflect signal suppression or enhancement at each Li<sub>2</sub>S concentration.

Table S4. Plasma robustness assessed in DW, 0.1% (w/v) Li<sub>2</sub>S, and 1% (w/v) Li<sub>2</sub>S matrices using the Mg(II) 280.270 nm / Mg(I) 285.213 nm ionic-to-atomic emission intensity ratio. A Mg(II)/Mg(I) value above 8.0 confirms sufficient plasma excitation temperature for stable ionization under the prevailing matrix load.

| <b>Matrix</b>                | <b>Mg 285.213(I)</b> | <b>Mg 280.271(II)</b> | <b>Mg ratio(II/I)</b> |
|------------------------------|----------------------|-----------------------|-----------------------|
| <b>0.1 % Li<sub>2</sub>S</b> | 33277.9              | 349438.6              | 10.5                  |
| <b>1% Li<sub>2</sub>S</b>    | 30273.7              | 321166.3              | 10.6                  |

Plasma robustness was evaluated via the Mg(II) 280.270 nm / Mg(I) 285.213 nm intensity ratio (n = 8) in 0.1% and 1.0% (w/v) Li<sub>2</sub>S matrices. Ratios exceeding 8.0 indicate a robust plasma resistant to matrix interferences. The values obtained confirmed adequate plasma conditions at both concentrations, validating the suitability of 1% (w/v) Li<sub>2</sub>S for reliable ICP-OES analysis.

Table S5. Recovery (%) of 16 target analytes determined by EC and IS correction using five IS candidates, namely Sc, Y, Ru, In, and Bi, across their respective analytical wavelengths in a 1% (w/v) Li<sub>2</sub>S matrix.

| Recovery(%)<br>Elements(nm) | EC   | Y            | Ru           | Bi           |              | Sc           |              |
|-----------------------------|------|--------------|--------------|--------------|--------------|--------------|--------------|
|                             |      | 324.227      | 240.272      | 223.061      | 190.171      | 424.683      | 361.383      |
| Cu 324.752                  | 65.6 | 120.5        | 186.6        | 143.7        | 150.1        | 119.3        | 117.0        |
| Pb 220.353                  | 45.1 | 82.8         | 126.8        | <b>98.0</b>  | <b>102.1</b> | 81.2         | 79.7         |
| Zn 213.857                  | 50.9 | <b>93.2</b>  | 143.0        | 110.5        | 115.3        | <b>91.8</b>  | <b>90.1</b>  |
| Cr 267.716                  | 44.8 | 82.9         | 127.0        | <b>98.1</b>  | <b>102.3</b> | 81.4         | 79.8         |
| Ni 231.604                  | 38.5 | 74.3         | 114.1        | 87.9         | <b>91.7</b>  | 72.6         | 71.3         |
| Al 308.215                  | 62.7 | 119.8        | 187.1        | 143.4        | 149.9        | 118.4        | 116.1        |
| Fe 259.939                  | 47.3 | <b>95.9</b>  | 147.1        | 113.7        | 118.6        | <b>94.5</b>  | <b>92.8</b>  |
| Mn 257.610                  | 43.2 | 79.2         | 120.9        | <b>93.6</b>  | <b>97.6</b>  | 77.8         | 76.3         |
| Ba 455.403                  | 60.7 | <b>107.0</b> | 164.5        | 127.1        | 132.6        | <b>105.7</b> | <b>103.7</b> |
| B 249.772                   | 46.6 | 84.8         | 129.9        | <b>100.4</b> | <b>104.7</b> | 83.3         | 81.7         |
| Ca 317.933                  | 61.2 | 153.9        | 242.0        | 185.2        | 193.9        | 153.1        | 150.1        |
| Co 228.616                  | 38.7 | 72.8         | 110.8        | 85.8         | 89.5         | 71.3         | 70.0         |
| Mg 279.077                  | 52.3 | <b>101.0</b> | 154.8        | 119.7        | 124.9        | <b>99.6</b>  | <b>97.7</b>  |
| Sr 407.771                  | 59.4 | <b>104.5</b> | 160.4        | 124.0        | 129.3        | <b>103.1</b> | <b>101.1</b> |
| Sb 206.836                  | 42.9 | 83.1         | 127.8        | <b>98.5</b>  | <b>102.8</b> | 81.5         | 80.0         |
| Be 313.107                  | 40.5 | 72.4         | <b>109.4</b> | 85.1         | 88.6         | 71.0         | 69.8         |

Analyte recoveries obtained by EC and IS correction were compared for six IS candidates. Standard and IS stock solutions were spiked into 1% (w/v) Li<sub>2</sub>S as described in Section 2.2. Recoveries within 100 ± 20% (target: 100 ± 15%) were considered acceptable.

Table S5-1. Comparison of signal intensities and Matrix Effects (ME, %) for six IS candidates in Li<sub>2</sub>S matrix and deionized water (DW).

| IS CPS \ IS nm | Y       | Ru      | Bi      |         | Sc       |          |
|----------------|---------|---------|---------|---------|----------|----------|
|                | 324.227 | 240.272 | 223.061 | 190.171 | 424.683  | 361.383  |
| DW CPS         | 65126.1 | 13334.2 | 4603.4  | 863.6   | 441140.2 | 247296.1 |
| Matrix CPS     | 35421.2 | 4644.5  | 2080.1  | 373.1   | 237594.8 | 136562.9 |
| ME(%)          | 54      | 35      | 45      | 43      | 54       | 55       |

Table S6. Method detection limits (MDLs) for 16 target analytes determined by external calibration (EC) and internal standard (IS) correction using five IS candidates, namely Sc, Y, Ru, In, and Bi, in a 1% (w/v) Li<sub>2</sub>S matrix.

| MDL(mg/L) \ Elements(nm) | EC   | Y       | Ru      | Bi      |         | Sc      |         |
|--------------------------|------|---------|---------|---------|---------|---------|---------|
|                          |      | 324.227 | 240.272 | 223.061 | 190.171 | 424.683 | 361.383 |
| Cu 324.752               | 0.02 | 0.04    | 0.08    | 0.04    | 0.06    | 0.04    | 0.04    |
| Pb 220.353               | 0.04 | 0.02    | 0.05    | 0.03    | 0.03    | 0.03    | 0.03    |
| Zn 213.857               | 0.05 | 0.03    | 0.01    | 0.01    | 0.02    | 0.03    | 0.03    |
| Cr 267.716               | 0.04 | 0.02    | 0.01    | 0.01    | 0.02    | 0.02    | 0.02    |
| Ni 231.604               | 0.04 | 0.02    | 0.02    | 0.01    | 0.02    | 0.02    | 0.03    |
| Al 308.215               | 0.1  | 0.04    | 0.2     | 0.08    | 0.1     | 0.04    | 0.05    |
| Fe 259.939               | 0.04 | 0.03    | 0.01    | 0.01    | 0.02    | 0.03    | 0.03    |
| Mn 257.610               | 0.03 | 0.02    | 0.01    | 0.01    | 0.02    | 0.02    | 0.02    |
| Ba 455.403               | 0.05 | 0.01    | 0.06    | 0.03    | 0.05    | 0.004   | 0.004   |
| B 249.772                | 0.04 | 0.04    | 0.02    | 0.01    | 0.04    | 0.04    | 0.05    |
| Ca 317.933               | 0.1  | 0.04    | 0.18    | 0.1     | 0.2     | 0.04    | 0.04    |
| Co 228.616               | 0.03 | 0.01    | 0.01    | 0.01    | 0.01    | 0.01    | 0.01    |
| Mg 279.077               | 0.05 | 0.07    | 0.10    | 0.06    | 0.08    | 0.08    | 0.08    |
| Sr 407.771               | 0.06 | 0.004   | 0.06    | 0.03    | 0.05    | 0.002   | 0.003   |
| Sb 206.836               | 0.04 | 0.05    | 0.08    | 0.05    | 0.06    | 0.06    | 0.06    |
| Be 313.107               | 0.02 | 0.02    | 0.01    | 0.01    | 0.02    | 0.02    | 0.02    |

Table S7. LOQs for 16 analytes in a 1% (w/v) Li<sub>2</sub>S matrix.

| LOQ(mg/L)<br>Elements(nm) | EC   | Y       | Ru      | Bi      |         | Sc      |         |
|---------------------------|------|---------|---------|---------|---------|---------|---------|
|                           |      | 324.227 | 240.272 | 223.061 | 190.171 | 424.683 | 361.383 |
| Cu 324.752                | 0.08 | 0.1     | 0.3     | 0.1     | 0.2     | 0.1     | 0.1     |
| Pb 220.353                | 0.2  | 0.07    | 0.2     | 0.09    | 0.1     | 0.08    | 0.09    |
| Zn 213.857                | 0.2  | 0.1     | 0.03    | 0.03    | 0.08    | 0.1     | 0.1     |
| Cr 267.716                | 0.2  | 0.07    | 0.02    | 0.02    | 0.05    | 0.07    | 0.08    |
| Ni 231.604                | 0.1  | 0.07    | 0.06    | 0.03    | 0.06    | 0.08    | 0.08    |
| Al 308.215                | 0.3  | 0.1     | 0.5     | 0.3     | 0.4     | 0.1     | 0.2     |
| Fe 259.939                | 0.1  | 0.09    | 0.03    | 0.02    | 0.07    | 0.09    | 0.1     |
| Mn 257.610                | 0.1  | 0.07    | 0.04    | 0.03    | 0.05    | 0.08    | 0.08    |
| Ba 455.403                | 0.2  | 0.02    | 0.2     | 0.1     | 0.2     | 0.01    | 0.01    |
| B 249.772                 | 0.1  | 0.1     | 0.06    | 0.02    | 0.1     | 0.2     | 0.2     |
| Ca 317.933                | 0.5  | 0.1     | 0.6     | 0.4     | 0.5     | 0.2     | 0.1     |
| Co 228.616                | 0.1  | 0.04    | 0.04    | 0.03    | 0.05    | 0.05    | 0.05    |
| Mg 279.077                | 0.2  | 0.2     | 0.3     | 0.2     | 0.3     | 0.3     | 0.3     |
| Sr 407.771                | 0.2  | 0.01    | 0.20    | 0.1     | 0.2     | 0.01    | 0.01    |
| Sb 206.836                | 0.1  | 0.2     | 0.3     | 0.2     | 0.2     | 0.2     | 0.2     |
| Be 313.107                | 0.08 | 0.06    | 0.05    | 0.04    | 0.06    | 0.06    | 0.07    |

5 mg/L standard spiked into 1% (w/v) Li<sub>2</sub>S. MDL = 2.998 × s (one-tailed t-value, 99th percentile, 7 d.f.); LOQ = 10 × s, per the US EPA MDL procedure [17].

Table S8. Calibration linearity expressed as coefficients of determination ( $R^2$ ) for 16 target analytes determined by EC and IS correction using five IS candidates, namely Sc, Y, Ru, In, and Bi, across their respective analytical wavelengths.

| <b>R<sup>2</sup></b><br><b>Elements(nm)</b> | <b>Y</b>       | <b>Ru</b>      | <b>Bi</b>      |                | <b>Sc</b>      |                |
|---------------------------------------------|----------------|----------------|----------------|----------------|----------------|----------------|
|                                             | <b>324.227</b> | <b>240.272</b> | <b>223.061</b> | <b>190.171</b> | <b>424.683</b> | <b>361.383</b> |
| Cu 324.752                                  | 0.999          | 1.000          | 1.000          | 1.000          | 0.999          | 0.999          |
| Pb 220.353                                  | 0.999          | 1.000          | 1.000          | 1.000          | 0.999          | 1.000          |
| Zn 213.857                                  | 0.999          | 1.000          | 1.000          | 1.000          | 1.000          | 1.000          |
| Cr 267.716                                  | 0.999          | 1.000          | 1.000          | 1.000          | 1.000          | 1.000          |
| Ni 231.604                                  | 1.000          | 0.999          | 1.000          | 0.999          | 0.999          | 0.999          |
| Al 308.215                                  | 0.999          | 0.997          | 0.998          | 0.997          | 0.997          | 0.997          |
| Fe 259.939                                  | 0.999          | 1.000          | 1.000          | 1.000          | 1.000          | 1.000          |
| Mn 257.610                                  | 0.998          | 1.000          | 1.000          | 1.000          | 1.000          | 1.000          |
| Ba 455.403                                  | 0.999          | 1.000          | 1.000          | 1.000          | 1.000          | 1.000          |
| B 249.772                                   | 0.999          | 1.000          | 1.000          | 1.000          | 1.000          | 1.000          |
| Ca 317.933                                  | 0.998          | 0.995          | 0.995          | 0.995          | 0.993          | 0.994          |
| Co 228.616                                  | 0.999          | 1.000          | 1.000          | 1.000          | 0.999          | 1.000          |
| Mg 279.077                                  | 0.999          | 1.000          | 1.000          | 1.000          | 1.000          | 1.000          |
| Sr 407.771                                  | 0.999          | 1.000          | 1.000          | 1.000          | 1.000          | 1.000          |
| Sb 206.836                                  | 0.999          | 1.000          | 1.000          | 1.000          | 0.999          | 1.000          |
| Be 313.107                                  | 0.998          | 0.999          | 0.999          | 0.999          | 0.999          | 1.000          |

over a concentration range of 0.05–2 mg/L. Both EC and IS correction methods were employed, achieving excellent linearity with  $R^2 \geq 0.995$  across all analytes.

Figure S1,S2. Emission spectra of Y (324.227 nm) and Y (371.029 nm) in different matrices.

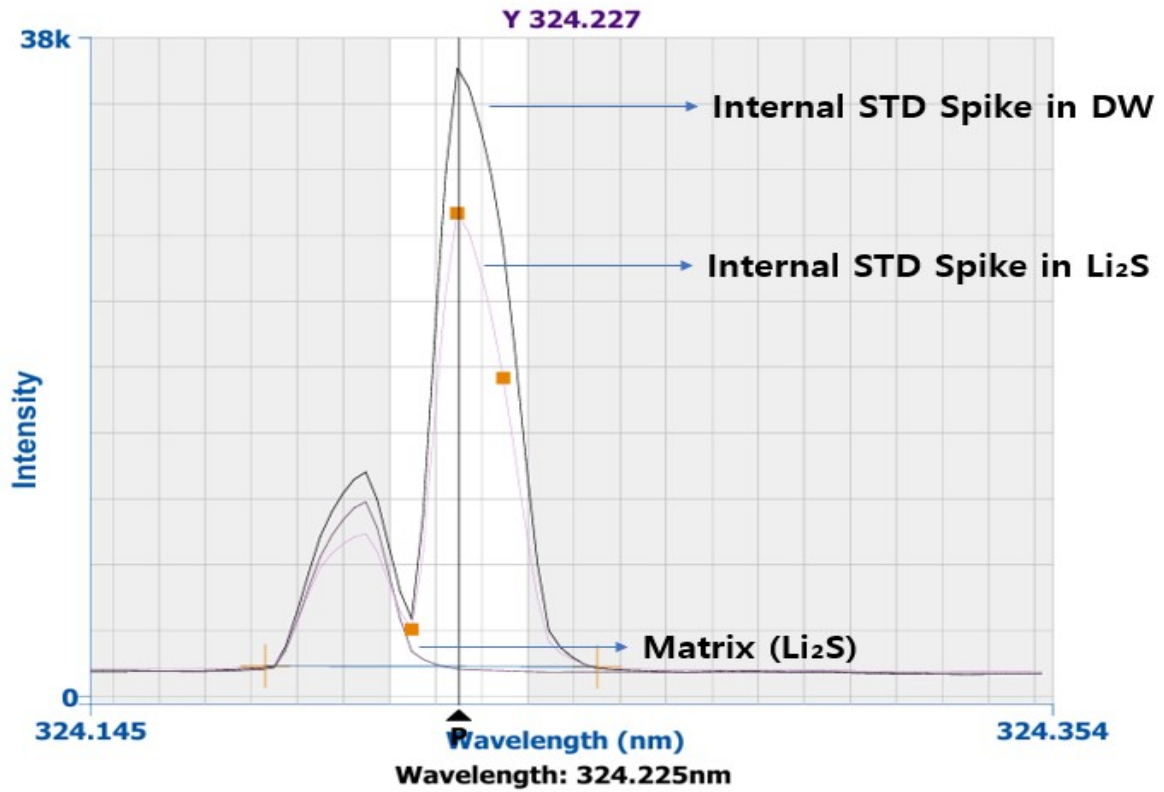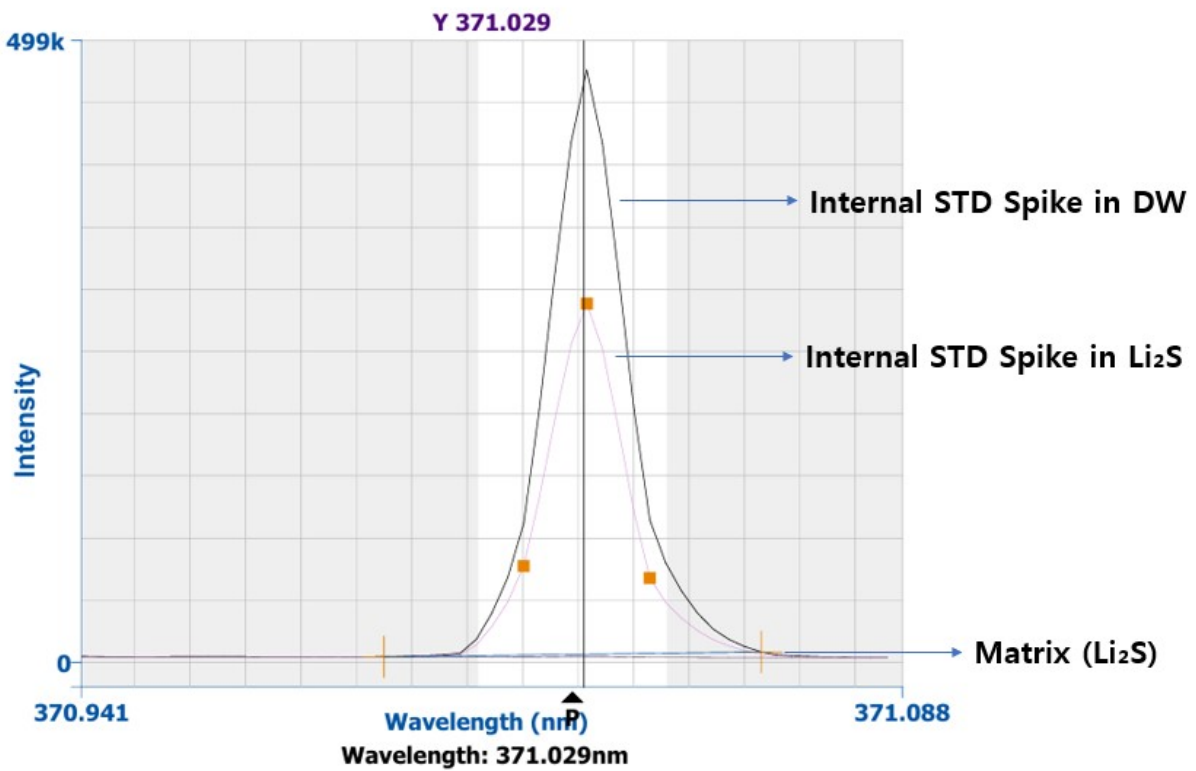

Emission spectra were compared among IS in deionized water (black), IS in 1% (w/v)  $\text{Li}_2\text{S}$  (pink), and a  $\text{Li}_2\text{S}$  matrix blank (purple) to assess spectral interferences. Both Y lines showed consistent peak positions and shapes regardless of the matrix, with no observable wavelength shifts or overlaps. The  $\text{Li}_2\text{S}$  blank exhibited no detectable signals at these wavelengths, confirming that the discrepancy in normalization effects is not due to spectral interference but stems from energy-dependent matrix effects within the plasma.
